# Supplementary figures and images for: Effect of Nucleating Agents Addition on Thermal and Mechanical Properties of Natural Fiber-Reinforced Polylactic Acid Composites
Source: MDPI journal article supplement (doi:10.3390/polym14204263), 2022-10-11

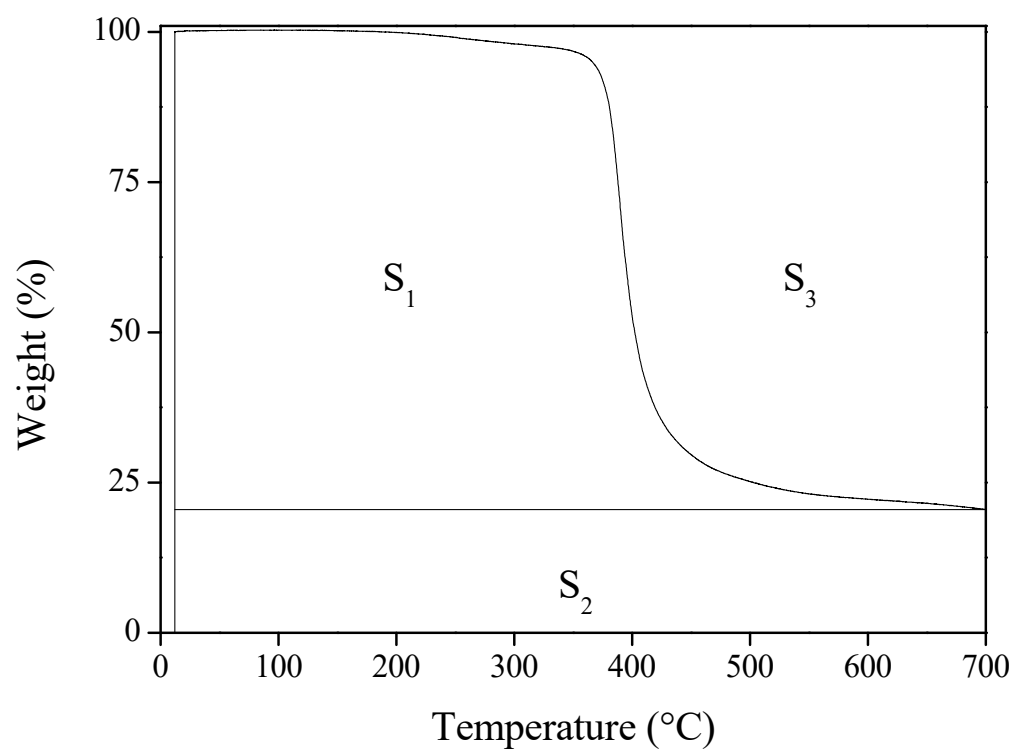

**Figure S1.** Schematic of S<sub>1</sub>, S<sub>2</sub>, and S<sub>3</sub> for A\* and K\*.

Supplement: s1 [file s1]
